# Supplementary material for: Parameters of proteome evolution from histograms of amino-acid sequence identities of paralogous proteins
Source: PubMed Central journal article supplement (PMC2246104; doi:10.1186/1745-6150-2-32), 2007-11-26

# Figure S2

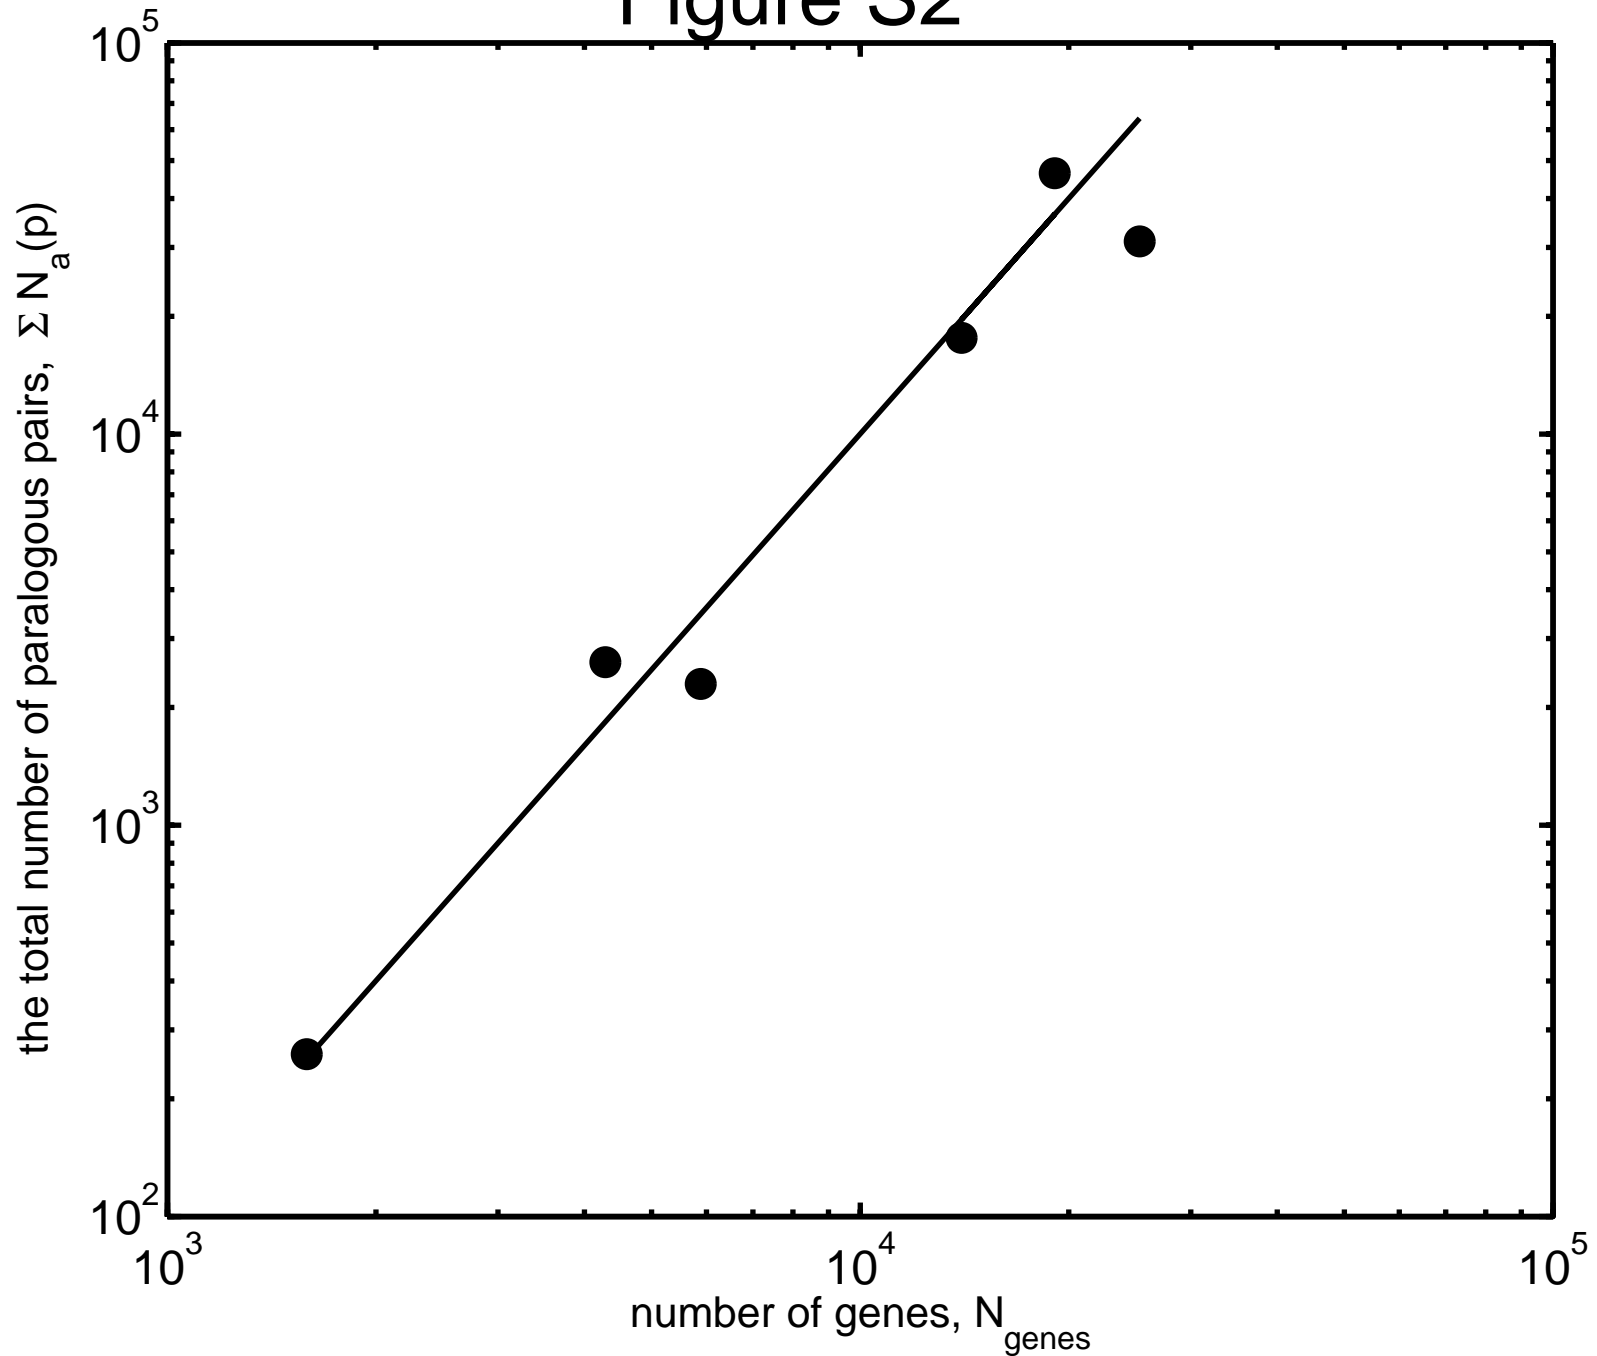

Supplement: 1745-6150-2-32-S2.pdf [file 1745-6150-2-32-S2.pdf]
